# Supplementary material
Source: PubMed Central journal article supplement (PMC409916)

## Simultaneous Detection Channels

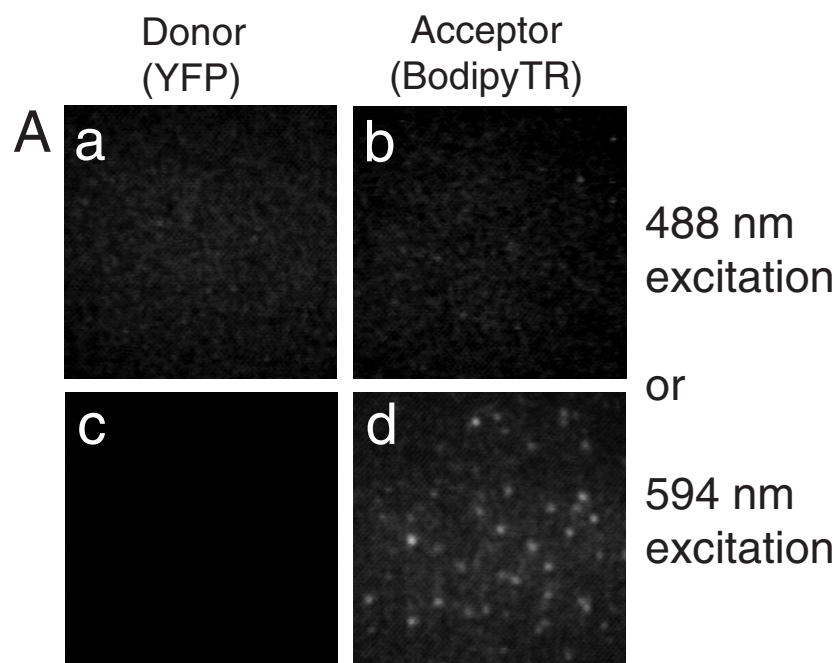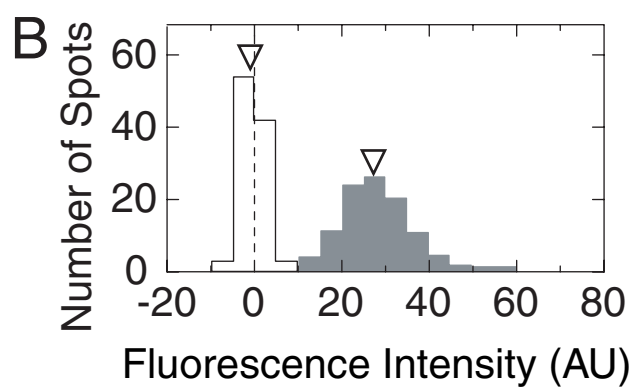

Supplement: pnas_101_19_7317__2.pdf [file pnas_101_19_7317__2.pdf]

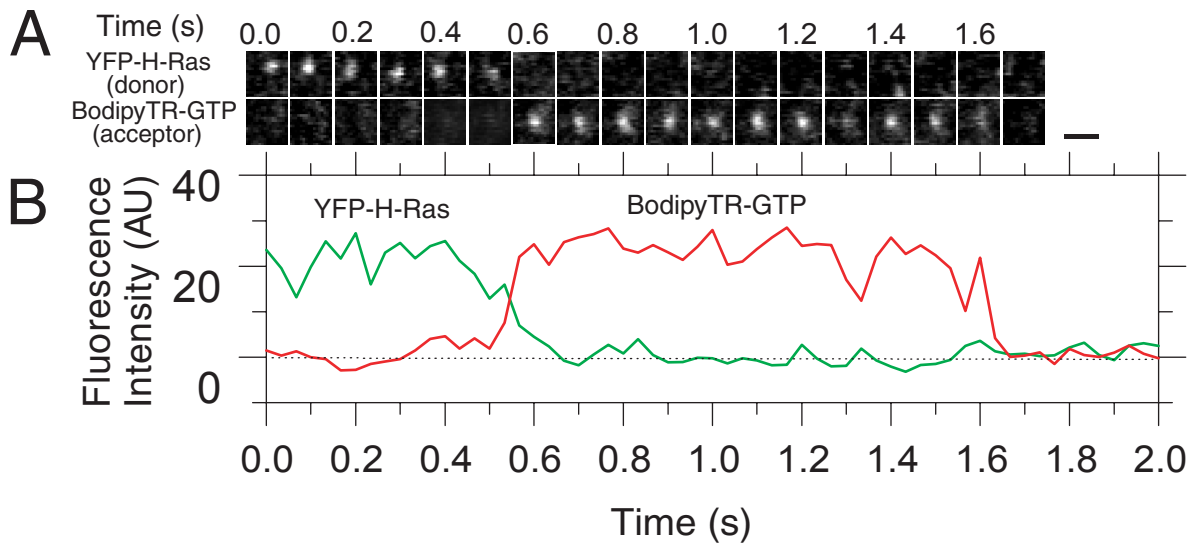

Supplement: pnas_101_19_7317__3.pdf [file pnas_101_19_7317__3.pdf]

(□: Latrunculin B)

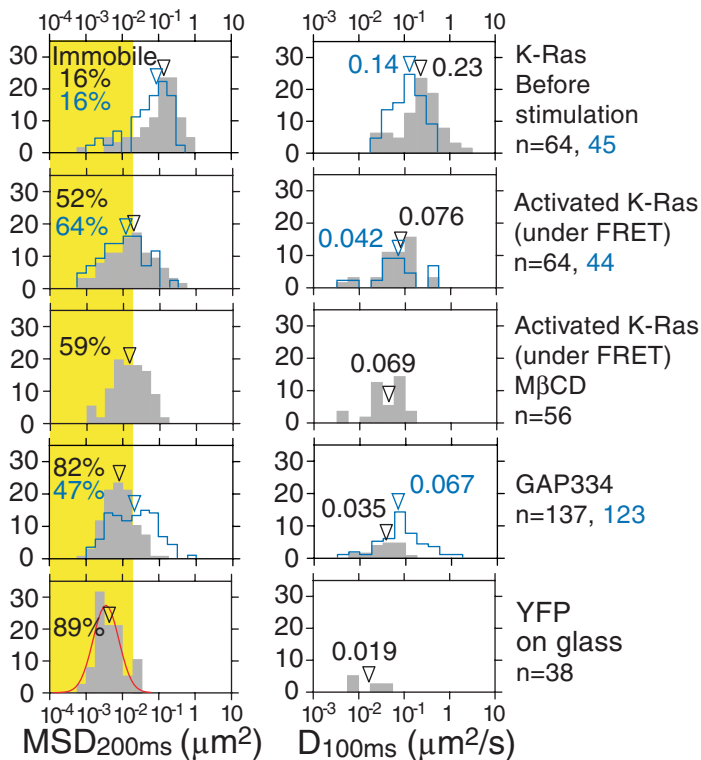

Supplement: pnas_101_19_7317__4.pdf [file pnas_101_19_7317__4.pdf]
